# Supplementary material
Source: MDPI journal article supplement (https://www.mdpi.com/2073-445X/12/9/1722)
Supplement: s1 [file s1 › land-2531763-supplementary.pdf]

## Supplementary Materials

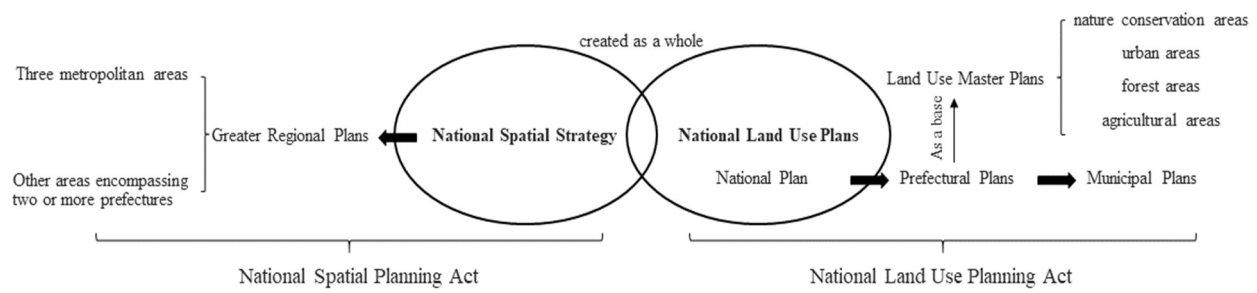

**Figure S1.** The planning system for national land use in Japan.

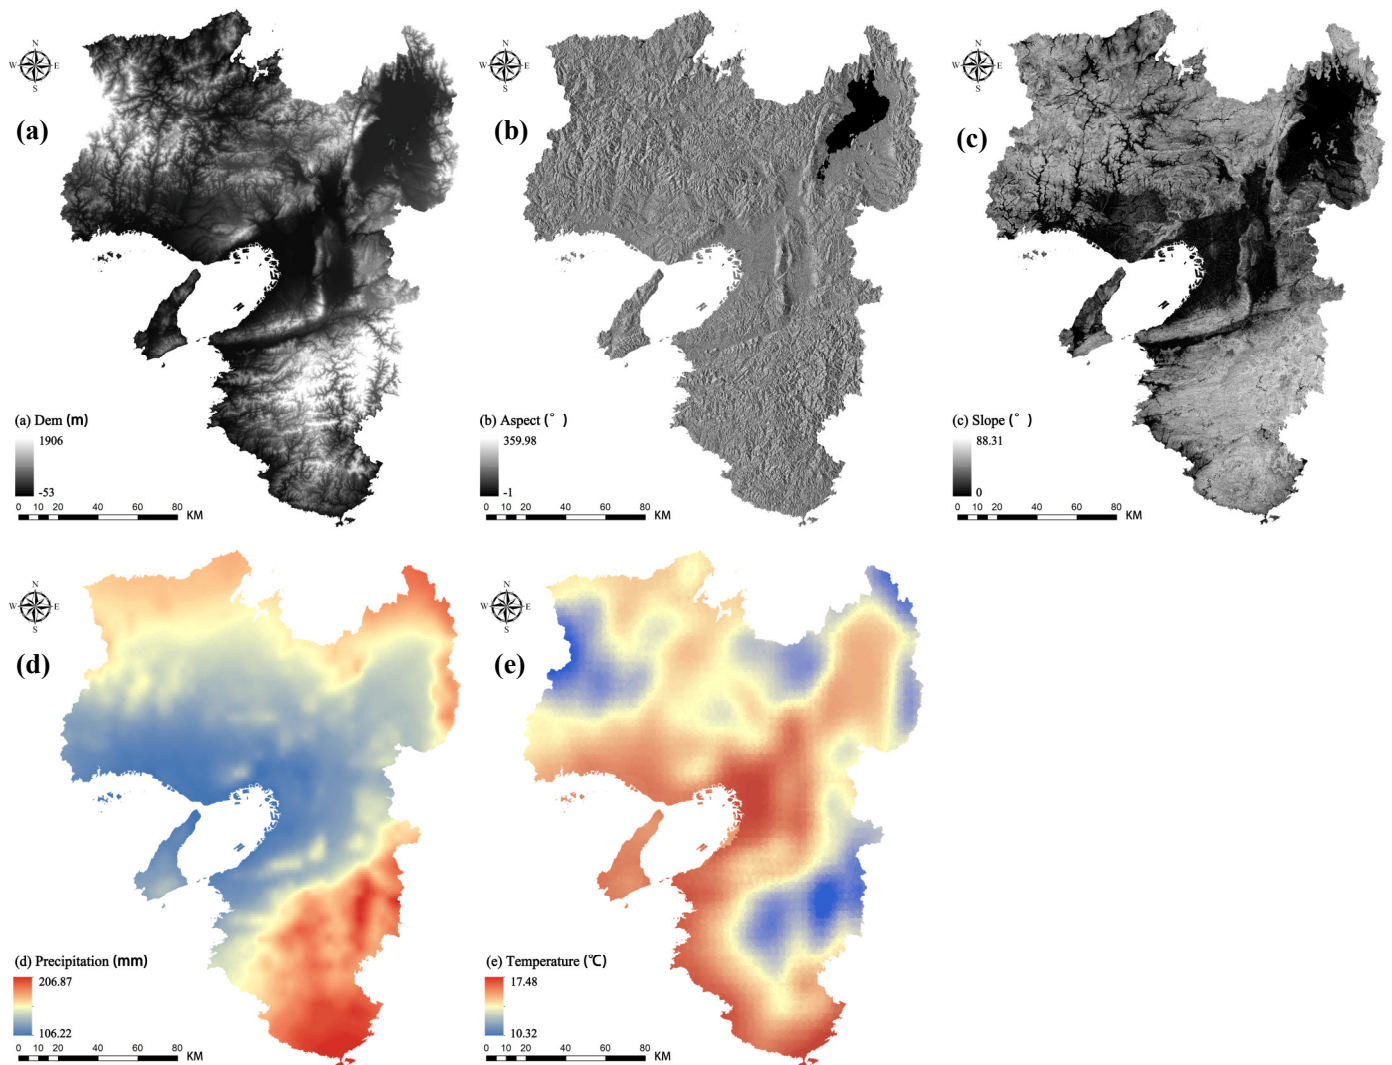

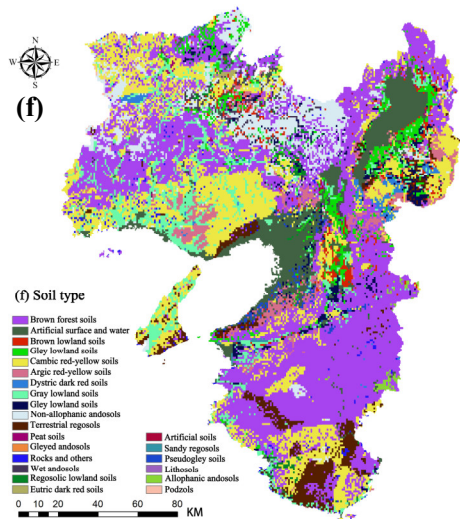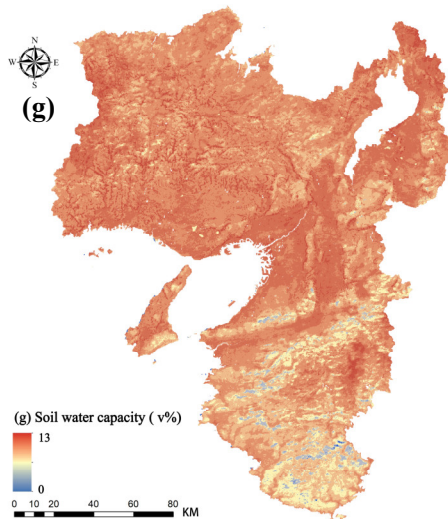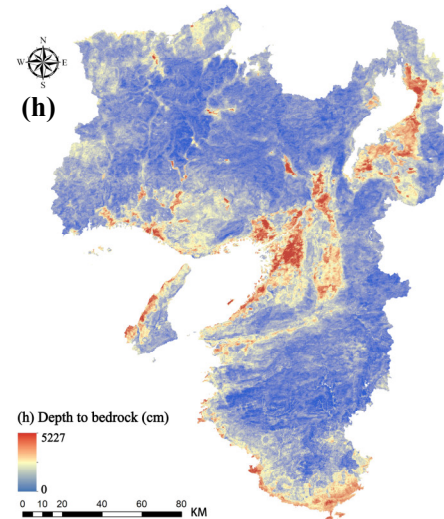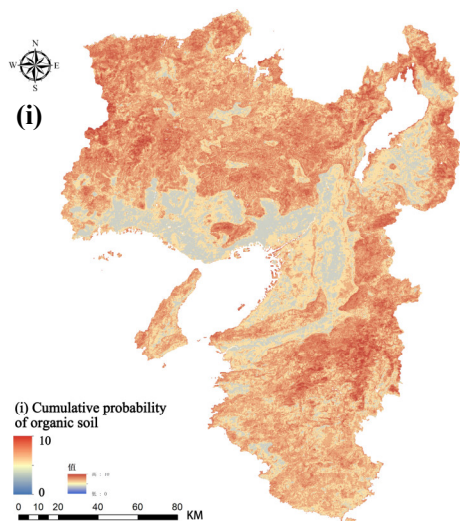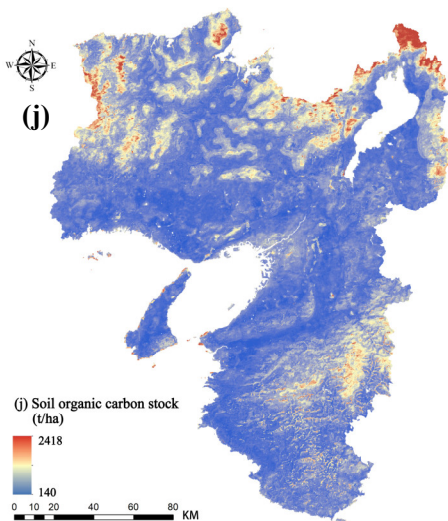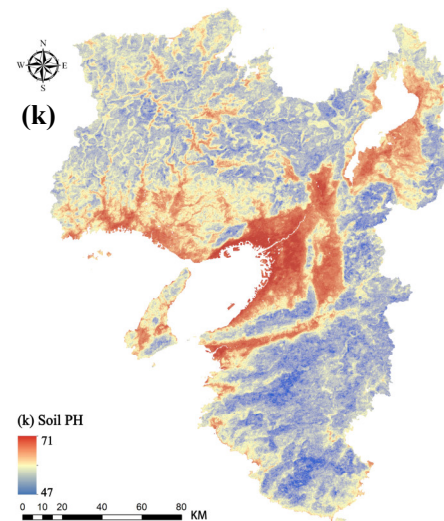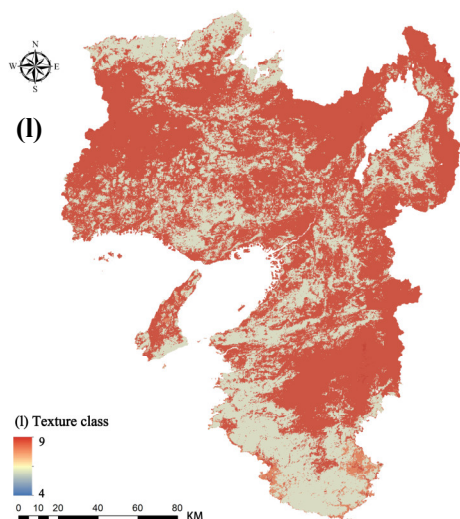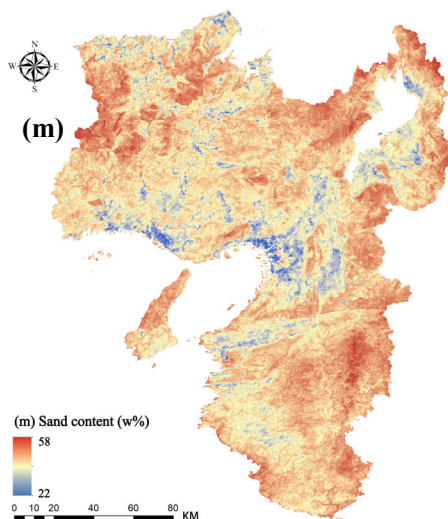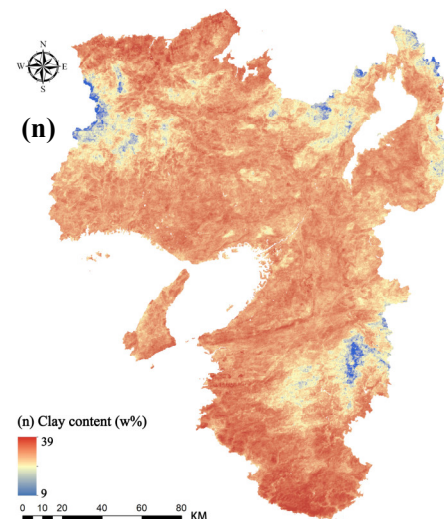

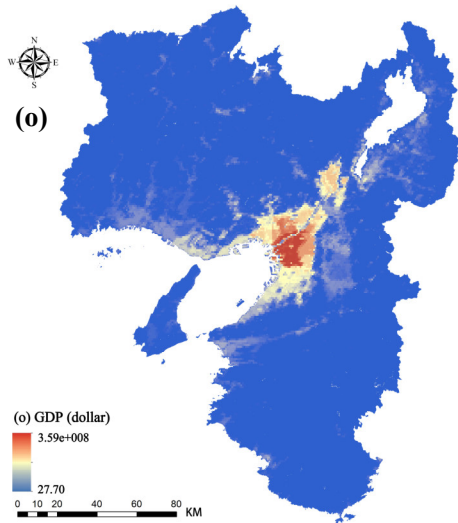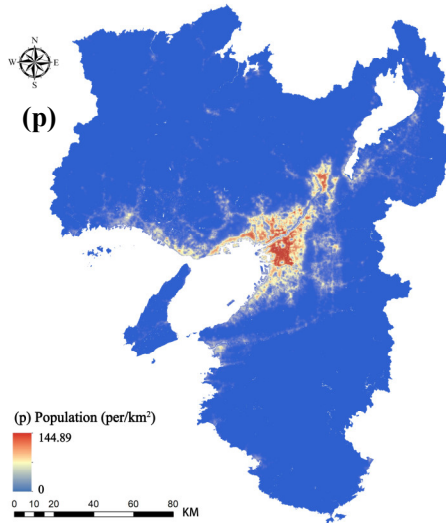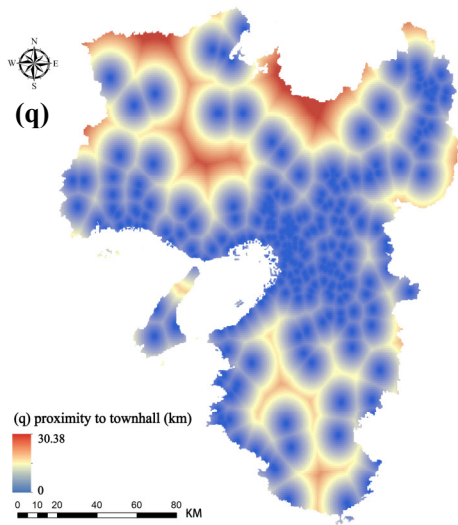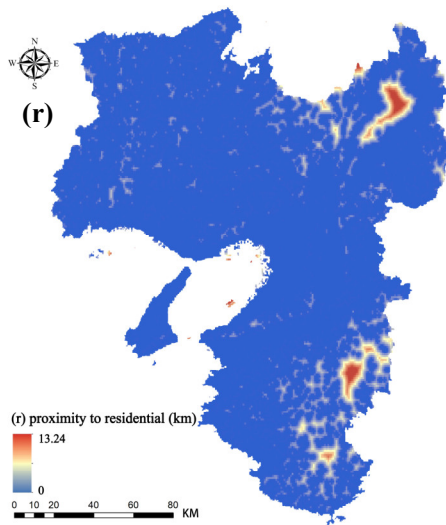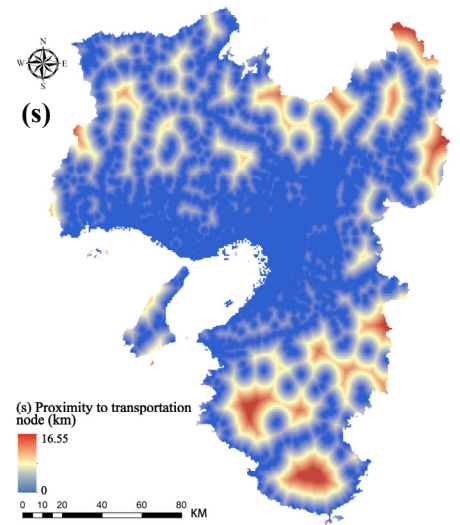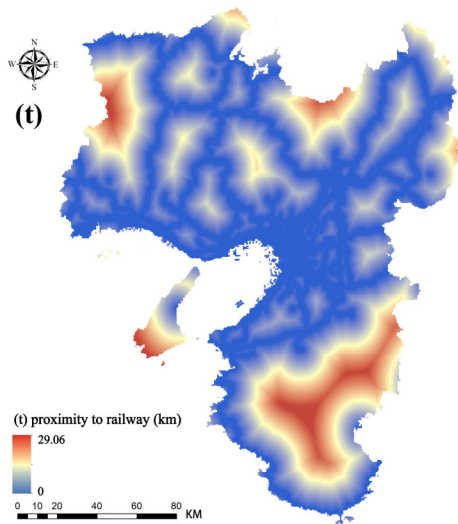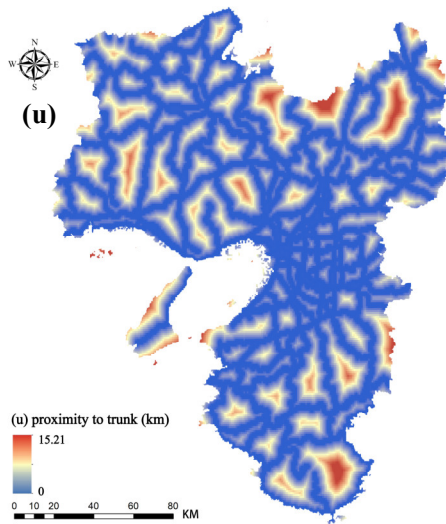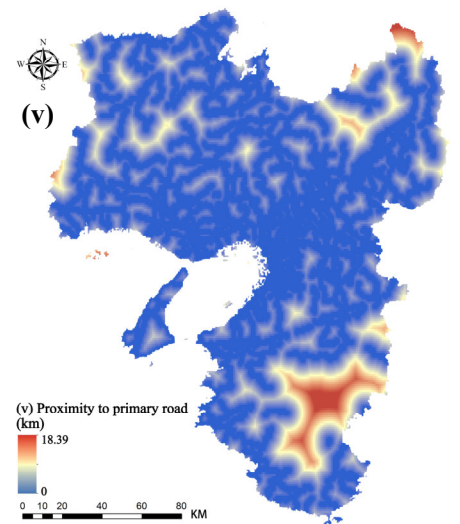

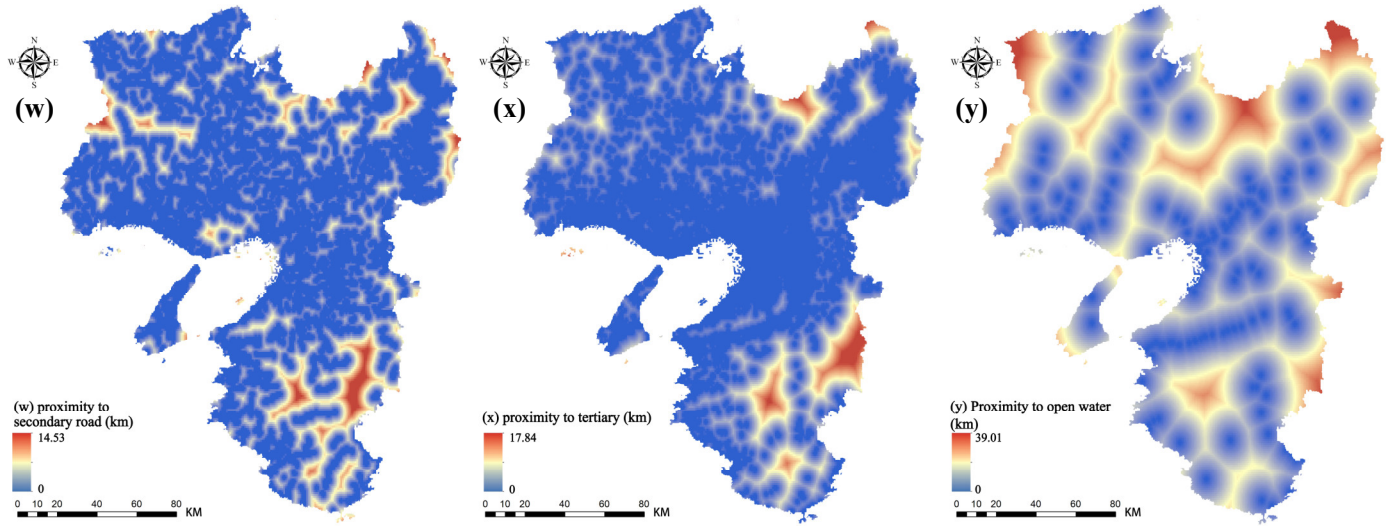

**Figure S2.** Driving factors in Kinki metropolitan

((a) DEM, (b) Slope, (c) Aspect, (d) Annual mean precipitation, (e) Annual mean temperature, (f) Soil type, (g) Soil water capacity, (h) Depth to bedrock, (i) Cumulative probability of organic soil, (j) Soil organic carbon stock, (k) Soil PH, (l) Texture class, (m) Sand content, (n) Clay content, (o) GDP density, (p) Population density, (q) Proximity to town hall, (r) Proximity to residential, (s) Proximity to transportation node, (t) Proximity to railway, (u) Proximity to trunk/motorway, (v) Proximity to primary road, (w) Proximity to secondary road, (x) Proximity to tertiary road, (y) Proximity to open water).

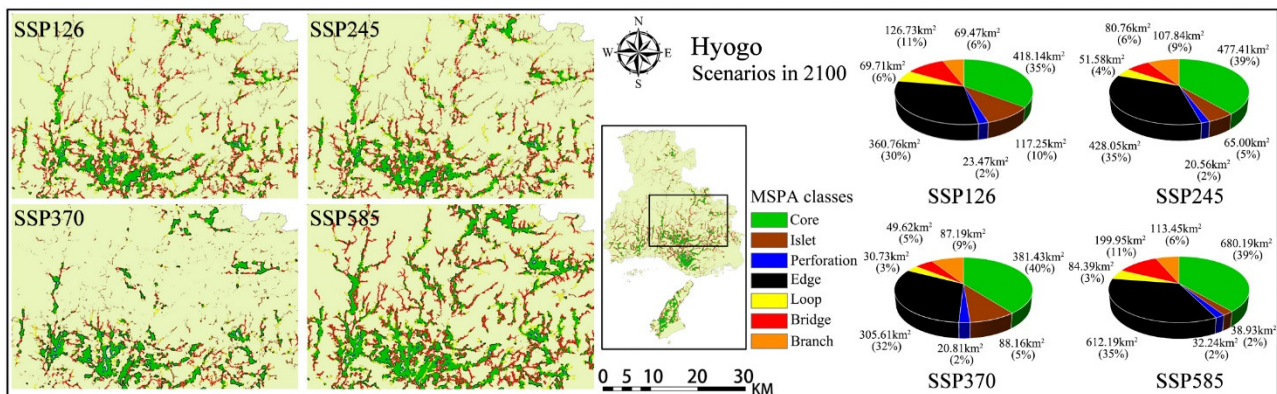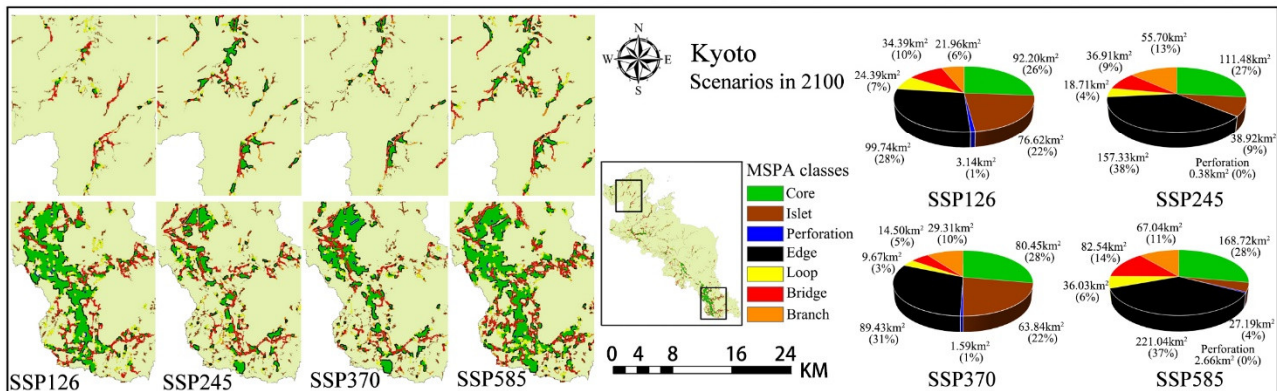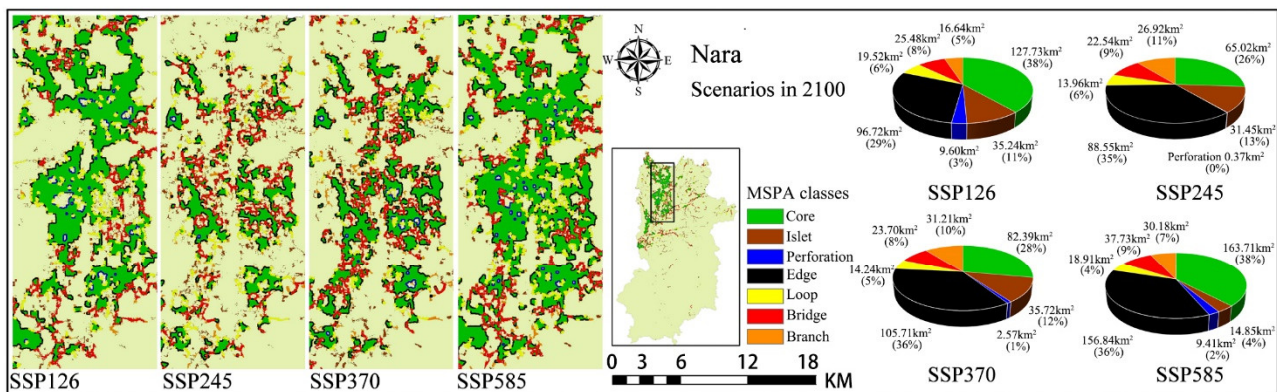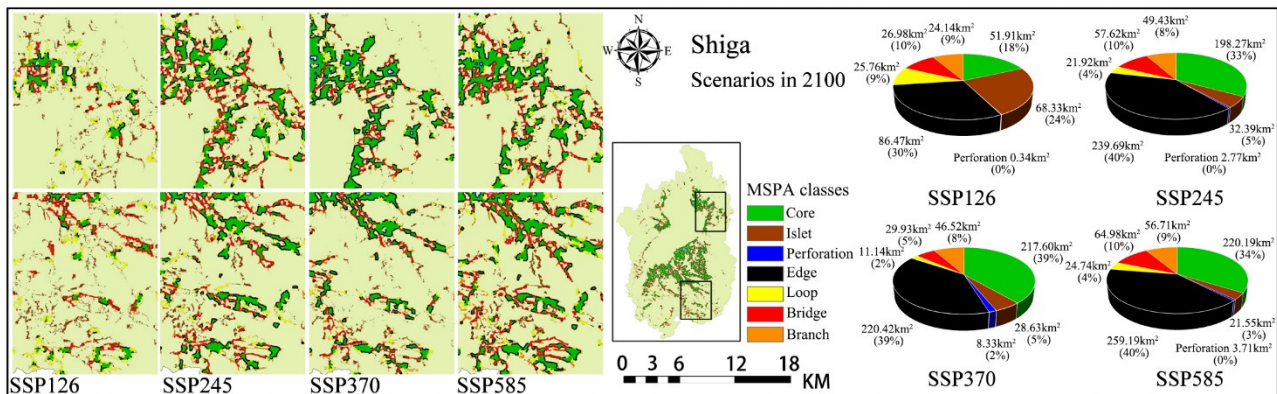

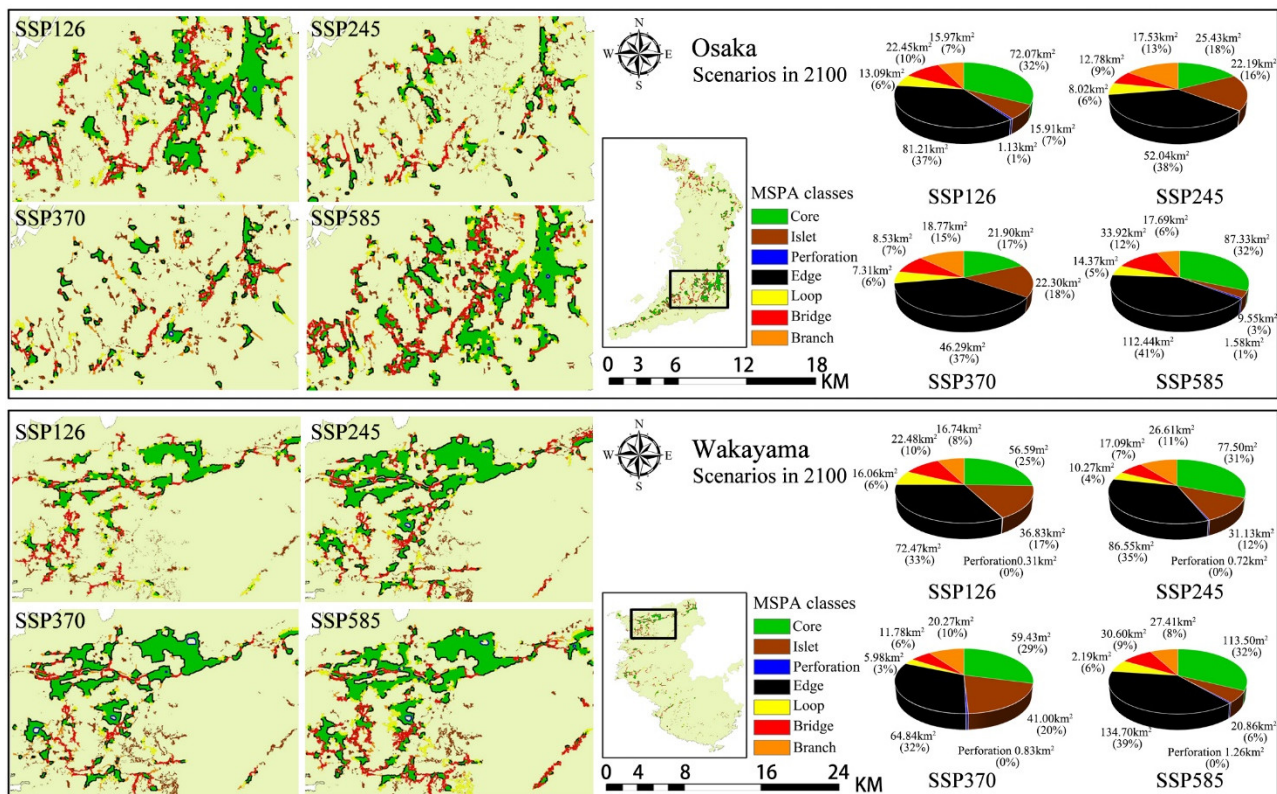

**Figure S3.** MSPA classes of cultivated land in four scenarios at 2100.

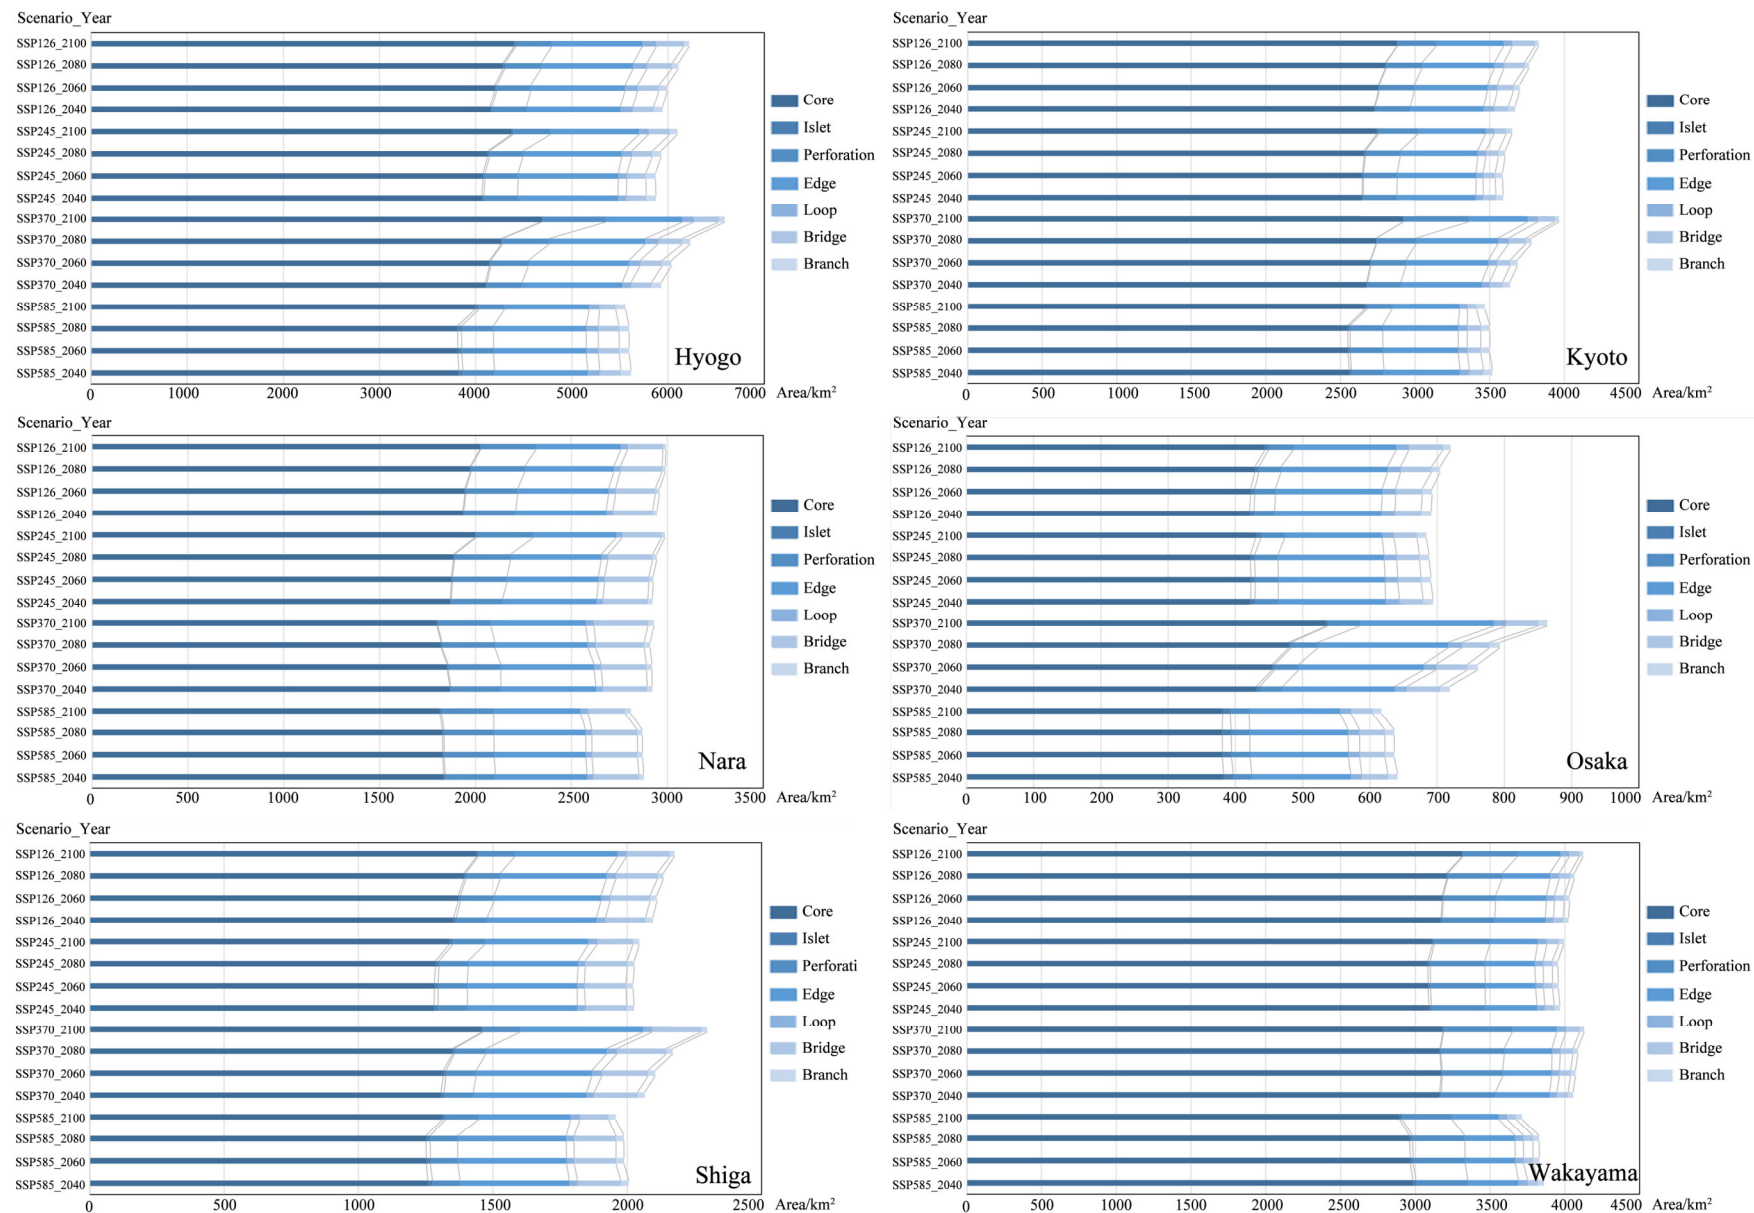

Figure S4. MSPA classes change of forest in prefectures under four scenarios

**Table S1.** Some scenarios used in this study ("✓" represents we have chosen)

|                                        | sustainability | Middle of the road | regional rivalry | Inequity | Fossil-Fuels |
|----------------------------------------|----------------|--------------------|------------------|----------|--------------|
| Shared socio-economic pathways         | SSP1 ✓         | SSP2 ✓             | SSP3 ✓           | SSP4     | SSP5 ✓       |
| Representative concentration pathways  | RCP1.9         | RCP4.5 ✓           | RCP7.0 ✓         | RCP3.4   | RCP8.5 ✓     |
|                                        | RCP2.6 ✓       |                    |                  | RCP6.0   |              |
| SSPs-RCPs scenarios used in this study | SSP126         | SSP245             | SSP370           |          | SSP585       |

**Table S2.** Comparison between actual LULC in 2020 and simulation result in 2020

| LUCC type           | 2020_Actual data (km <sup>2</sup> ) | Simulation_ Markov chains (km <sup>2</sup> ) | Error (%) |
|---------------------|-------------------------------------|----------------------------------------------|-----------|
| Cultivated land     | 3531.61                             | 3984.14                                      | 12.81%    |
| Forest              | 19273.82                            | 19069.41                                     | 1.06%     |
| Grassland           | 338.39                              | 299.32                                       | 11.55%    |
| Waterbody           | 857.24                              | 819.83                                       | 4.36%     |
| Artificial surfaces | 3199.80                             | 3030.42                                      | 5.29%     |
| Bare land           | 128.85                              | 126.68                                       | 1.68%     |
